# Supplementary material for: Rapid Recombination Mapping for High-Throughput Genetic Screens in Drosophila
Source: PubMed Central journal article supplement (PMC3852393; doi:10.1534/g3.113.008615), 2013-10-29
Supplement: supp_g3.113.008615_TableS1.pdf [file supp_g3.113.008615_TableS1.pdf]

**Table S1 Useful dominant markers for mapping on the second chromosome**

| <b>genotype</b>       | <b>name</b>           | <b>cM</b> | <b>cytology</b> |
|-----------------------|-----------------------|-----------|-----------------|
| <i>S[1]</i>           | <i>Star, Asteroid</i> | 2-1.3     | 21E4            |
| <i>wg[Sp-1]</i>       | <i>Sternopleural</i>  | 2-22      | 27F1            |
| <i>J[1]</i>           | <i>Jammed</i>         | 2-41      | 31E             |
| <i>amos[Tft]</i>      | <i>Tufted</i>         | 2-53.6    | 36F6            |
| <i>Bl[1]</i>          | <i>Bristle</i>        | 2-54.8    | 38B5            |
| <i>L[rm] or L[2]</i>  | <i>Lobe</i>           | 2-72      | 51A4            |
| <i>nw[D] or nw[B]</i> | <i>narrow</i>         | 2-79.6    | 54A1            |
| <i>Bc[1]</i>          | <i>Black cells</i>    | 2-80.6    | 54F6            |
| <i>Pu[2]</i>          | <i>Punch</i>          | 2-97      | 57C7            |
| <i>Frd[1]</i>         | <i>Freckled</i>       | 2-102.4   | 59C1-4          |
| <i>Pin[1]</i>         | <i>Pin</i>            | 2-107.3   | 60C6-D1         |

Most available as stocks in various multiply-marked combinations from BDSC
