# Supplementary material for: Rapid Recombination Mapping for High-Throughput Genetic Screens in Drosophila
Source: PubMed Central journal article supplement (PMC3852393; doi:10.1534/g3.113.008615), 2013-10-29
Supplement: supp_g3.113.008615_TableS3.pdf [file supp_g3.113.008615_TableS3.pdf]

**Table S3** Reliable mutant directionality even when *Gl,Sb* marker pair is not used.

| Mutant | <i>R,D</i> | <i>Gl,+</i> | <i>+,Sb</i> | <i>+,+</i> | <i>Sb,H</i> | <i>H,Pr</i> |
|--------|------------|-------------|-------------|------------|-------------|-------------|
| psg19  | →          | 10          | 7           | 2          | ←           | ←           |
| psg3   | →          | 14          | 3           | 0          |             |             |
| psg27  | →          | 6           | 1           | 0          | ←           | ←           |
| psg21  |            | 12          | 2           | 1          | ←           | ←           |
| psg22  | →          | 1           | 2           | 4          | ←           | ←           |
| psg10  | →          | 5           | 21          | 11         | ←           | ←           |
| psg14  | →          | 12          | 4           | 0          | ←           | ←           |
| psg15  | →          | 11          | 13          | 0          |             | ←           |
| psg9   | →          | 7           | 1           | 0          | ←           | ←           |
| psg20  | →          | 4           | 1           | 2          | ←           | ←           |

Direction of recombination “splits” in the *R,D*, *Sb,H*, and *H,Pr* pairs accurately locate mutations to the *Gl,Sb* interval.
